# Supplementary material
Source: HighWire-hosted journal article supplement (https://nutrition.bmj.com/content/6/1/56)
Supplement: inline-supplementary-material-1 [file inline-supplementary-material-1.pdf]

## SUPPLEMENTARY TABLES

**Table S1: A linear mixed model analysis of the association between household food insecurity and depressive symptoms among adolescent girls in north-eastern Ghana**

| Statistical Model      | Food secured | Mild Food Insecurity            |         | Moderate Food Insecurity        |         | Severe Food Insecurity          |         |
|------------------------|--------------|---------------------------------|---------|---------------------------------|---------|---------------------------------|---------|
|                        |              | <sup>1</sup> Estimate (95% C.I) | P-value | <sup>1</sup> Estimate (95% C.I) | P-value | <sup>1</sup> Estimate (95% C.I) | P-value |
| <b>Model 1 (Crude)</b> | Ref          | 1.76 (-73.9, 77.4)              | 0.95    | 72.9 (-8.4, 154.2)              | 0.10    | 134.9 (47.5, 222.2)             | 0.0005  |
| <b>Model 2</b>         | Ref          | -14.9 (-88.6, 58.9)             | 0.95    | 49.2 (-31.7, 130.0)             | 0.40    | 111.4 (23.6, 199.3)             | 0.006   |
| <b>Model 3</b>         | Ref          | -6.3 (-80.7, 68.0)              | 0.99    | 69.0 (-13.3, 151.3)             | 0.14    | 125.2 (37.9, 212.6)             | 0.001   |
| <b>Model 4</b>         | Ref          | -6.4 (-80.7, 68.0)              | 0.99    | 69.4 (-13.0, 151.7)             | 0.13    | 125.5 (38.1, 212.8)             | 0.001   |
| <b>Model 5</b>         | Ref          | -11.2 (-85.0, 63.4)             | 0.98    | 63.4 (-19.3, 146.1)             | 0.20    | 120.5 (32.9, 208.0)             | 0.002   |
| <b>Model 6</b>         | Ref          | -11.5 (-86.1, 63.1)             | 0.98    | 63.9 (-18.9, 146.6)             | 0.19    | 120.9 (33.3, 208.5)             | 0.002   |

<sup>1</sup>The outcome is the log-transformed variable for depression score; hence the estimate is the percentage point increase in depression score for food insecurity compared to food security; 95% C.I, 95% confidence interval; model 2 included child psychological factors including life satisfaction, self-efficacy, self-esteem, and health complaints; model 3 additionally adjusted for other child-level factors including child's age, menarche status, anaemia, stunting, mean frequency of consuming fruits and vegetables and mean frequency of animal foods consumption; model 4 was further adjusted for maternal age and model 5 adjusted for household factors including wealth index and household size, and finally model 6 adjusted for the treatment. Model fit for final adjusted model: -2 Log L 2743.6; AIC 2783.6
